# Supplementary material
Source: MDPI journal article supplement (https://www.mdpi.com/2076-3263/13/12/363)
Supplement: s1 [file s1]

# PDF Card No. : 04-015-7165 Quality: I

|                    |                                                                                                                                                                                                                                                                                                                                                                                                                                                             |                   |               |
|--------------------|-------------------------------------------------------------------------------------------------------------------------------------------------------------------------------------------------------------------------------------------------------------------------------------------------------------------------------------------------------------------------------------------------------------------------------------------------------------|-------------------|---------------|
| Sub-File Name:     | Inorganic, Mineral, Alloy&Metal, Pharmaceutical, LFP Pattern                                                                                                                                                                                                                                                                                                                                                                                                |                   |               |
| Formula:           | Si O2                                                                                                                                                                                                                                                                                                                                                                                                                                                       |                   |               |
| Name:              | coesite                                                                                                                                                                                                                                                                                                                                                                                                                                                     | I/Ic (RIR) = 0.83 |               |
| Crystal System:    | Monoclinic                                                                                                                                                                                                                                                                                                                                                                                                                                                  | Space Group:      | C2/c(15)      |
| Cell Parameters:   | a= 6.9520                                                                                                                                                                                                                                                                                                                                                                                                                                                   | b= 12.1986        | c= 7.0942     |
|                    | Alpha= 90.000                                                                                                                                                                                                                                                                                                                                                                                                                                               | Beta= 120.820     | Gamma= 90.000 |
|                    | Volume= 516.661                                                                                                                                                                                                                                                                                                                                                                                                                                             | Z= 16             |               |
| Reference:         | Angel R.J., Shaw C.S.J., Gibbs G.V. Phys. Chem. Miner. 30(2003)167-176.                                                                                                                                                                                                                                                                                                                                                                                     |                   |               |
| Radiation:         | CuK $\alpha$                                                                                                                                                                                                                                                                                                                                                                                                                                                | Wavelength=       | 1.54060       |
| 2Theta range:      | 14.51 - 96.23                                                                                                                                                                                                                                                                                                                                                                                                                                               |                   |               |
| Database comments: | ANX: AX2. LFP Collection Code: 1220073. Pressure of Data Collection: 6.16 GPa. Calculated Pattern. Original Remarks: LFP Editor Comment: unit for isotropic displacement parameters omitted, assumed to be EPSILON2. LFP Editor Comment: experimental procedure described in Phys. Earth Planet. Inter. (2001) 124, 71. Minor Warning: No e.s.d reported/abstracted on the cell dimension. Wyckoff Sequence: f5 e a. Unit Cell Data Source: Single Crystal. |                   |               |

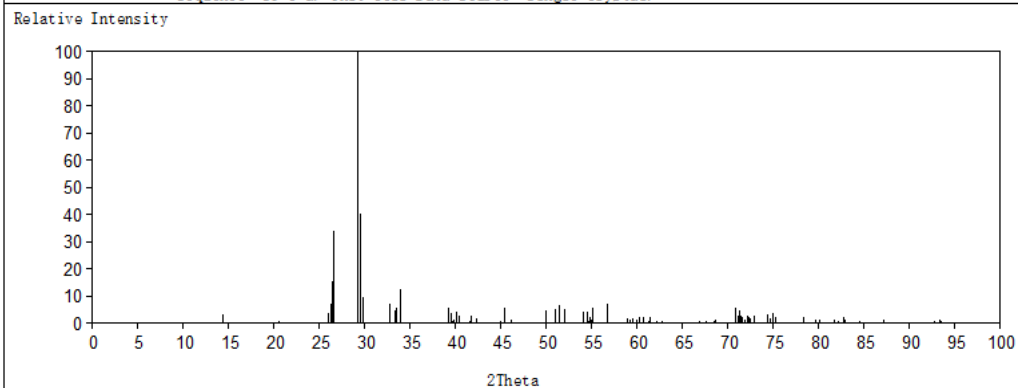

| No. | 2Theta | d-Value | Intensity | h  | k | l | No. | 2Theta | d-Value | Intensity | h  | k | l |
|-----|--------|---------|-----------|----|---|---|-----|--------|---------|-----------|----|---|---|
| 1   | 14.51  | 6.099   | 3.5       | 0  | 2 | 0 | 21  | 40.47  | 2.227   | 3.2       | -3 | 1 | 1 |
| 2   | 16.22  | 5.460   | 0.3       | -1 | 1 | 1 | 22  | 41.60  | 2.169   | 1.3       | -2 | 2 | 3 |
| 3   | 16.52  | 5.362   | 0.2       | 1  | 1 | 0 | 23  | 41.84  | 2.158   | 2.9       | -2 | 4 | 2 |
| 4   | 20.59  | 4.310   | 1.1       | 0  | 2 | 1 | 24  | 42.33  | 2.133   | 1.9       | 2  | 4 | 0 |
| 5   | 26.14  | 3.408   | 4.1       | -1 | 1 | 2 | 25  | 42.60  | 2.121   | 0.5       | 2  | 2 | 1 |
| 6   | 26.31  | 3.384   | 7.4       | -1 | 3 | 1 | 26  | 44.53  | 2.033   | 0.1       | 0  | 6 | 0 |
| 7   | 28.30  | 3.361   | 16.0      | 1  | 3 | 0 | 27  | 44.97  | 2.014   | 1.1       | -1 | 3 | 3 |
| 8   | 28.71  | 3.335   | 34.2      | 1  | 1 | 1 | 28  | 45.13  | 2.007   | 0.6       | -1 | 5 | 2 |
| 9   | 29.26  | 3.050   | 100.0     | 0  | 0 | 2 | 29  | 45.42  | 1.995   | 6.1       | 1  | 5 | 1 |
| 10  | 29.56  | 3.019   | 40.6      | -2 | 2 | 1 | 30  | 45.82  | 1.979   | 0.1       | -3 | 3 | 1 |
| 11  | 29.91  | 2.985   | 9.8       | 2  | 0 | 0 | 31  | 46.18  | 1.964   | 1.7       | 3  | 1 | 0 |
| 12  | 32.84  | 2.725   | 7.3       | 0  | 4 | 1 | 32  | 47.13  | 1.927   | 0.1       | 0  | 2 | 3 |
| 13  | 33.39  | 2.681   | 5.0       | 2  | 2 | 0 | 33  | 49.30  | 1.847   | 0.3       | -2 | 4 | 3 |
| 14  | 33.50  | 2.673   | 5.8       | -1 | 3 | 2 | 34  | 50.08  | 1.820   | 4.9       | -3 | 3 | 3 |
| 15  | 33.95  | 2.638   | 12.8      | 1  | 3 | 1 | 35  | 51.05  | 1.787   | 5.3       | 3  | 3 | 0 |

Supplementary File S4. Table S1. ICDD Reference data of coesite.
