# Supplementary material
Source: MDPI journal article supplement (https://www.mdpi.com/2076-3263/13/12/363)
Supplement: s1 [file s1]

Archive with 4 entries (4 files):
- Supplementary File S1. Quality control.xlsx
- Supplementary File S2. Field iamges of the crater.pdf
- Supplementary File S3. Deformation features.pdf
- Supplimentary File S4. ICCD reference data of coesite.pdf
