# Supplementary material
Source: MDPI journal article supplement (https://www.mdpi.com/2076-3263/13/12/363)
Supplement: s1 [file s1 › Supplementary File S1. Quality control.xlsx]

## Sheet: QC-Standard
Supplementary File 1. Table1: Detection limits and quality control of analysis
Central Analytical and Applied Research UNIt (CAARU). Report: 0123-2023
Quality Control
Analyte Symbol			Au	SiO2		Al2O3	Fe2O3(T)	MnO	MgO			CaO	Na2O	K2O	TiO2		P2O5	LOI	Total	Ba	Sr	Y	Sc	Zr	Be	V
Unit Symbol			ppb	%		%	%	%	%			%	%	%	%		%	%	%	ppm	ppm	ppm	ppm	ppm	ppm	ppm
Detection Limit			30	0.01		0.01	0.01	0.001	0.01			0.01	0.01	0.01	0.001		0.01		0.01	2	2	1	1	2	1	5
Analysis Method			FA-AA	FUS-ICP		FUS-ICP	FUS-ICP	FUS-ICP	FUS-ICP			FUS-ICP	FUS-ICP	FUS-ICP	FUS-ICP		FUS-ICP	FUS-ICP	FUS-ICP	FUS-ICP	FUS-ICP	FUS-ICP	FUS-ICP	FUS-ICP	FUS-ICP	FUS-ICP
NIST 694 Meas				11.46		1.89	0.74	0.013	0.34			42.72	0.86	0.54	0.118		30.2									1647
NIST 694 Cert				11.2		1.8	0.79	0.0116	0.33			43.6	0.86	0.51	0.11		30.2									1740
DNC-1 Meas				46.81		18.69	9.96	0.147	10.02			11.44	1.89	0.22	0.484		0.07			105	144	16	31	35		163
DNC-1 Cert				47.15		18.34	9.97	0.15	10.13			11.49	1.89	0.234	0.48		0.07			118	144	18	31	38		148
GBW 07113 Meas				72.78		12.89	3.18	0.14	0.14			0.6	2.47	5.41	0.286		0.04			499	41	45	5	395	4	8
GBW 07113 Cert				72.8		13	3.21	0.14	0.16			0.59	2.57	5.43	0.3		0.05			506	43	43	5	403	4	5
W-2a Meas				52.47		15.28	10.79	0.166	6.26			11.06	2.19	0.61	1.073		0.13			174	192	19	35	86	< 1	281
W-2a Cert				52.4		15.4	10.7	0.163	6.37			10.9	2.14	0.626	1.06		0.13			182	190	24	36	94	1.3	262
SY-4 Meas				50.1		20.45	6.17	0.107	0.5			8.12	6.98	1.67	0.289		0.13			347	1202	117	1	535	3	12
SY-4 Cert				49.9		20.69	6.21	0.108	0.54			8.05	7.1	1.66	0.287		0.131			340	1191	119	1.1	517	2.6	8
BIR-1a Meas				48.18		15.64	11.44	0.172	9.59			13.62	1.81	0.02	0.963		0.03			7	106	14	44	14	< 1	348
BIR-1a Cert				47.96		15.5	11.3	0.175	9.7			13.3	1.82	0.03	0.96		0.021			6	110	16	44	18	0.58	310
OxD108 Meas			430
OxD108 Cert			414
SQ-15 Orig				38.61		2.3	30.43	0.307	21.24			2.24	1.04	0.16	0.101		0.23	2.65	99.31	113	952	< 1	8	7	< 1	86
SQ-15 Dup				38.97		2.27	30.19	0.309	21.18			2.24	1.03	0.16	0.102		0.23	2.65	99.33	112	930	2	8	7	< 1	86
SR-11 Orig				2.62		0.38	12.02	0.964	12.65			30.01	0.39	0.02	0.251		8.9	28.8	97.02	1591	7469	190	20	265	6	70
SR-11 Dup				2.64		0.38	11.97	0.959	12.52			30	0.39	0.02	0.249		8.9	28.8	96.84	1581	7424	190	20	301	6	70
LP2 Orig			< 30
LP2 Dup			< 30
Central Analytical and Applied Research UNIt (CAARU). Report: 0123-2023
Quality Control
Analyte Symbol			V	Cr		Co	Ni	Cu	Zn			Ga	Ge	As	Rb		Sr	Y	Zr	Nb	Mo	Ag	In	Sn	Sb		Cs	Ba	La	Ce	Pr
Unit Symbol			ppm	ppm		ppm	ppm	ppm	ppm			ppm	ppm	ppm	ppm		ppm	ppm	ppm	ppm	ppm	ppm	ppm	ppm	ppm		ppm	ppm	ppm	ppm	ppm
Detection Limit			5	20		1	20	10	30			1	0.5	5	1		2	0.5	1	0.2	2	0.5	0.1	1	0.2		0.1	3	0.05	0.05	0.01
Analysis Method			FUS-MS	FUS-MS		FUS-MS	FUS-MS	FUS-MS	FUS-MS			FUS-MS	FUS-MS	FUS-MS	FUS-MS		FUS-MS	FUS-MS	FUS-MS	FUS-MS	FUS-MS	FUS-MS	FUS-MS	FUS-MS	FUS-MS		FUS-MS	FUS-MS	FUS-MS	FUS-MS	FUS-MS
DNC-1 Meas			145	270		58	250	110	70								145	17.4							1
DNC-1 Cert			148	270		57	247	100	70								144	18							0.96
LKSD-3 Meas						29	40	30	140						71		236	27.3			< 2	2.7			0.9		2.3	619	49	88.7
LKSD-3 Cert						30	47	35	152						78		240	30			2	2.7			1.3		2.3	680	52	90
TDB-1 Meas			469	240			90	340	160						21			34.9	160										18.2	41.7
TDB-1 Cert			471	251			92	323	155						23			36	156										17	41
W-2a Meas			262	80		44	70	110	70			17	1.7	< 5	19		189	21		7.6	< 2	0.8			0.8		1	168		24.7
W-2a Cert			262	92		43	70	110	80			17	1	1.2	21		190	24		7.9	0.6	0.046			0.79		0.99	182		23
DTS-2b Meas				> 10000		128	3790
DTS-2b Cert				15500		120	3780
CTA-AC-1 Meas			102					60																					> 2000	> 3000
CTA-AC-1 Cert			104					54																					2176	3326
BIR-1a Meas			319	380		53	160	130	80			16					108	15.5
BIR-1a Cert			310	370		52	170	125	70			16					110	16
NCS DC86312 Meas																		905											> 2000
NCS DC86312 Cert																		976											2360
ZW-C Meas									1050			95
ZW-C Cert									1050			99
NCS DC70014 Meas						25	70	2610	7400			25						32.5			> 100	16.4			180				46.3	88.1	10.6
NCS DC70014 Cert						26	70	2600	7400			25.2						32.1			270	16.7			180				45.3	87	10.8
NCS DC70009 (GBW07241) Meas				30			< 20	910	100			17	11.2	72	504			140					1.3	> 1000			44.7			64.8	8.58
NCS DC70009 (GBW07241) Cert				30			2.8	960	100			16.5	11.2	69.9	500			128					1.3	1701			41			60.3	7.9
OREAS 100a (Fusion) Meas			34			17		170										138			22								274	475	48
OREAS 100a (Fusion) Cert			36.7			18.1		169										142			24.1								260	463	47.1
OREAS 101a (Fusion) Meas			75			49		440										184			20								854	1410	139
OREAS 101a (Fusion) Cert			83			48.8		434										183			21.9								816	1396	134
OREAS 101b (Fusion) Meas			74			47	< 20	430										174			19								816	1340	132
OREAS 101b (Fusion) Cert			80			47	9	416										178			20.9								789	1331	127
JR-1 Meas			6				< 20	< 10	< 30			17			245		31	41.7		14.3	3	0.7	< 0.1	3	1.2		21.1	46	21.5	49.9
JR-1 Cert			7				1.67	2.68	30.6			16.1			257		29.1	45.1		15.2	3.25	0.031	0.028	2.86	1.19		20.8	50.3	19.7	47.2
NCS DC86318 Meas
NCS DC86318 Cert
SARM 3 Meas
SARM 3 Cert
Central Analytical and Applied Research UNIt (CAARU). Report: 0123-2023
Quality Control
Analyte Symbol			Nd	Sm		Eu	Gd	Tb	Dy			Ho	Er	Tm	Yb		Lu	Hf	Ta	W	Tl	Pb	Bi	Th	U
Unit Symbol			ppm	ppm		ppm	ppm	ppm	ppm			ppm	ppm	ppm	ppm		ppm	ppm	ppm	ppm	ppm	ppm	ppm	ppm	ppm
Detection Limit			0.05	0.01		0.005	0.01	0.01	0.01			0.01	0.01	0.005	0.01		0.002	0.1	0.01	0.5	0.05	5	0.1	0.05	0.01
Analysis Method			FUS-MS	FUS-MS		FUS-MS	FUS-MS	FUS-MS	FUS-MS			FUS-MS	FUS-MS	FUS-MS	FUS-MS		FUS-MS	FUS-MS	FUS-MS	FUS-MS	FUS-MS	FUS-MS	FUS-MS	FUS-MS	FUS-MS
DNC-1 Meas			5.09			0.641									2.05
DNC-1 Cert			5.2			0.59									2
LKSD-3 Meas			42.2	7.81		1.42		0.93	4.92						2.85		0.415		0.69					10.4	4.9
LKSD-3 Cert			44	8		1.5		1	4.9						2.7		0.4		0.7					11.4	4.6
TDB-1 Meas			24.9			2.13									3.42									2.95
TDB-1 Cert			23			2.1									3.4									2.7
W-2a Meas			13.5	3.4		1.1		0.67	3.95			0.83	2.29	0.342	2.12		0.32	2.4	0.49	< 0.5	< 0.05	10	0.2	2.56	0.53
W-2a Cert			13	3.3		1		0.63	3.6			0.76	2.5	0.38	2.1		0.33	2.6	0.5	0.3	0.2	9.3	0.03	2.4	0.53
DTS-2b Meas
DTS-2b Cert
CTA-AC-1 Meas			1160	172		47.4	133	15.1							11.2		1.15		2.68					23.2	4.11
CTA-AC-1 Cert			1087	162		46.7	124	13.9							11.4		1.08		2.65					21.8	4.4
BIR-1a Meas			2.6	1.18		0.549	2.11								1.72		0.273	0.5
BIR-1a Cert			2.5	1.1		0.55	2								1.7		0.3	0.6
NCS DC86312 Meas			1480				212	32.1	175			33.8	91.7	13.4	80.4		11.3							23.2
NCS DC86312 Cert			1600				225	34.6	183			36	96.2	15.1	87.79		11.96							23.6
ZW-C Meas																			82.3	333	33.2
ZW-C Cert																			82	320	34
NCS DC70014 Meas			38.6	7.98		1.78	7.36	1.19	6.75			1.28	3.56	0.566	3.47		0.507					> 10000	80.3
NCS DC70014 Cert			39.9	8		1.8	7.4	1.1	6.7			1.3	3.5	0.57	3.3		0.5					27200	80.3
NCS DC70009 (GBW07241) Meas			34.2	13.2			15.5	3.49	22.4			4.61	13.7	2.34	16.2		2.39			2200				29.8
NCS DC70009 (GBW07241) Cert			32.9	12.5			14.8	3.3	20.7			4.5	13.4	2.2	14.9		2.4			2200				28.3
OREAS 100a (Fusion) Meas			152	24.4		3.75	21.5	3.76	23.6			5.04	14.7	2.4	15.1		2.24							51.4	134
OREAS 100a (Fusion) Cert			152	23.6		3.71	23.6	3.8	23.2			4.81	14.9	2.31	14.9		2.26							51.6	135
OREAS 101a (Fusion) Meas			410	52.3		8.53		5.88	34.3			6.82	20.1	3.06	19		2.71							39.3	422
OREAS 101a (Fusion) Cert			403	48.8		8.06		5.92	33.3			6.46	19.5	2.9	17.5		2.66							36.6	422
OREAS 101b (Fusion) Meas			392	50.9		8.18		5.53	32.7			6.63	19.4	2.92	18.4		2.58							37.5	387
OREAS 101b (Fusion) Cert			378	48		7.77		5.37	32.1			6.34	18.7	2.66	17.6		2.58							37.1	396
JR-1 Meas			24.4	6.13		0.302		1.08						0.728	4.91		0.74	4.1	1.9	2.2	1.57	20		27.4	9.02
JR-1 Cert			23.3	6.03		0.3		1.01						0.67	4.55		0.71	4.51	1.86	1.59	1.56	19.3		26.7	8.88
NCS DC86318 Meas			> 2000	> 1000		18.8	> 1000	483	> 1000			579	> 1000	275	> 1000		254
NCS DC86318 Cert			3430	1720		18.91	2095	470	3220			560	1750	270	1840		260
SARM 3 Meas
SARM 3 Cert
